# Supplementary material
Source: Springer Nature journal article supplement (https://www.springermedizin.de/resource/supplementary/13075_2004_1379_MOESM2_ESM.pdf/9689640)

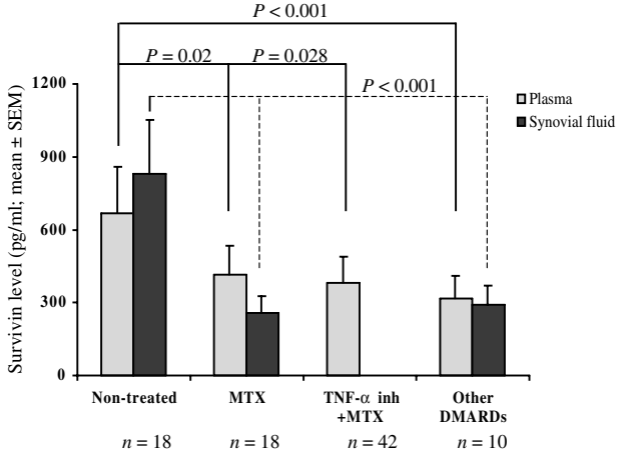

Supplement: MOESM2 [file 9689640]
